# Supplementary material for: The rise in stunting in relation to avian influenza and food consumption patterns in Lower Egypt in comparison to Upper Egypt: results from 2005 and 2008 Demographic and Health Surveys
Source: PubMed Central journal article supplement (PMC4405853; doi:10.1186/s12889-015-1627-3), 2015-03-25
Supplement: 12889_2015_1627_MOESM1_ESM.pdf [file 12889_2015_1627_MOESM1_ESM.pdf]

**Additional file: The association between child stunting and water and sanitation variables, in bivariate and multivariable analyses, Lower and Upper Egypt, 2005 and 2008 EDHS**

**Table 1. Proportion of stunting, 6-59 months, Lower Egypt 2005 (N= 2,292) and 2008 (N = 2,293)**

| Factor                              | 2005         |                             |         | 2008         |                             |         |
|-------------------------------------|--------------|-----------------------------|---------|--------------|-----------------------------|---------|
|                                     | Total N [%]  | Stunting, 6-59 months n [%] | p-value | Total N [%]  | Stunting, 6-59 months n [%] | p-value |
| <b>Drinking Water Source (Type)</b> |              |                             |         |              |                             |         |
| Piped Water                         | 2176 [94.94] | 367 [16.87]                 | 0.176   | 2143 [93.46] | 671 [31.31]                 | 0.493   |
| <b>Toilet Facility</b>              |              |                             |         |              |                             |         |
| Modern Flush Toilet                 | 846 [36.91]  | 134 [15.84]                 | 0.441   | 1020 [44.48] | 341 [33.43]                 | 0.073   |

**Table 2. Proportion of stunting, 6-59 months, Upper Egypt 2005 (N= 3,893) and 2008 (N = 2,708)**

| Factor                              | 2005         |                             |                  | 2008         |                             |                  |
|-------------------------------------|--------------|-----------------------------|------------------|--------------|-----------------------------|------------------|
|                                     | Total N [%]  | Stunting, 6-59 months n [%] | p-value          | Total N [%]  | Stunting, 6-59 months n [%] | p-value          |
| <b>Drinking Water Source (Type)</b> |              |                             |                  |              |                             |                  |
| Piped Water                         | 3577 [91.88] | 1021 [28.54]                | 0.294            | 2527 [93.32] | 548 [21.69]                 | 0.633            |
| <b>Toilet Facility</b>              |              |                             |                  |              |                             |                  |
| Modern Flush Toilet                 | 564 [14.49]  | 107 [18.97]                 | <b>&lt;0.001</b> | 530 [19.57]  | 15.85 [84]                  | <b>&lt;0.001</b> |

**Table 3: Determinants of stunting, children 6-59 months, Lower Egypt 2005 (N= 2,292) and 2008 (N= 2,293)**

| Factor                 | Adjusted OR 2005 | P-value      | 95% CI       | Adjusted OR 2008 | P-value          | 95% CI       |
|------------------------|------------------|--------------|--------------|------------------|------------------|--------------|
| <b>Residence</b>       |                  |              |              |                  |                  |              |
| Urban (ref)            | -                | -            | -            | -                | -                | -            |
| Rural                  | 0.962            | 0.839        | 0.659, 1.403 | 0.990            | 0.958            | 0.678, 1.446 |
| <b>Age of child</b>    |                  |              |              |                  |                  |              |
| 6-11 months (ref)      | -                | -            | -            | -                | -                | -            |
| 12-23 months           | 0.838            | 0.451        | 0.528, 1.333 | 2.267            | <b>&lt;0.001</b> | 1.519, 3.383 |
| 24-35 months           | 1.001            | 0.974        | 0.609, 1.670 | 2.122            | <b>0.001</b>     | 1.390, 3.238 |
| 36-47 months           | 0.458            | <b>0.006</b> | 0.264, 0.794 | 2.339            | <b>&lt;0.001</b> | 1.502, 3.643 |
| 48-59 months           | 0.377            | <b>0.003</b> | 0.196, 0.734 | 1.493            | 0.096            | 0.931, 2.393 |
| <b>Sex of child</b>    |                  |              |              |                  |                  |              |
| Females (ref)          | -                | -            | -            | -                | -                | -            |
| Males                  | 1.029            | 0.836        | 0.781, 1.357 | 1.289            | 0.023            | 1.036, 1.602 |
| <b>Wealth Quintile</b> |                  |              |              |                  |                  |              |

|                                         |       |       |              |       |              |              |
|-----------------------------------------|-------|-------|--------------|-------|--------------|--------------|
| Poorest (ref)                           | -     | -     | -            | -     | -            | -            |
| Poorer                                  | 0.856 | 0.570 | 0.501, 1.464 | 1.097 | 0.653        | 0.733, 1.642 |
| Middle                                  | 0.815 | 0.458 | 0.474, 1.401 | 1.002 | 0.993        | 0.667, 1.505 |
| Richer                                  | 0.672 | 0.256 | 0.338, 1.336 | 0.901 | 0.969        | 0.532, 1.524 |
| Richest                                 | 1.328 | 0.471 | 0.612, 2.883 | 1.050 | 0.878        | 0.564, 1.955 |
| <b>Perceived size of child at birth</b> |       |       |              |       |              |              |
| Very small or Small                     | 1.204 | 0.400 | 0.781, 1.856 | 1.201 | 0.343        | 0.823, 1.753 |
| Average or Larger (ref)                 | -     | -     | -            | -     | -            | -            |
| <b>Birth Intervals</b>                  |       |       |              |       |              |              |
| <24 months                              | 1.146 | 0.546 | 0.736, 1.784 | 1.384 | 0.063        | 0.982, 1.950 |
| 24-35 months                            | 1.142 | 0.534 | 0.750, 1.740 | 0.833 | 0.270        | 0.602, 1.153 |
| 36-47 months (ref)                      | -     | -     | -            | -     | -            | -            |
| 48+ months                              | 0.711 | 0.102 | 0.472, 1.070 | 1.009 | 0.950        | 0.760, 1.339 |
| <b>Avian influenza</b>                  |       |       |              |       |              |              |
| Household ownership of poultry/birds    | 1.046 | 0.801 | 0.736, 1.488 | 0.582 | <b>0.001</b> | 0.418, 0.812 |
| <b>Water and Sanitation</b>             |       |       |              |       |              |              |
| Piped water                             | 1.461 | 0.319 | 0.692, 3.083 | 1.007 | 0.973        | 0.660, 1.536 |
| Modern Flush Toilet                     | 0.208 | 0.199 | 0.444, 1.185 | 1.105 | 0.616        | 0.747, 1.635 |

**Table 4: Determinants of stunting, children 6-59 months, Upper Egypt 2005 (N= 3,893) and 2008 (N= 2,708)**

| Factor                 | Adjusted OR 2005 | P-value         | 95% CI       | Adjusted OR 2008 | P-value          | 95% CI       |
|------------------------|------------------|-----------------|--------------|------------------|------------------|--------------|
| <b>Residence</b>       |                  |                 |              |                  |                  |              |
| Urban (ref)            | -                | -               | -            | -                | -                | -            |
| Rural                  | 1.119            | 0.540           | 0.780, 1.605 | 0.926            | 0.640            | 0.669, 1.281 |
| <b>Age of child</b>    |                  |                 |              |                  |                  |              |
| 6-11 months (ref)      | -                | -               | -            | -                | -                | -            |
| 12-23 months           | 1.449            | <b>0.013</b>    | 1.082, 1.940 | 2.618            | <b>&lt;0.001</b> | 1.728, 3.969 |
| 24-35 months           | 1.026            | 0.877           | 0.745, 1.412 | 1.651            | <b>0.022</b>     | 1.075, 2.535 |
| 36-47 months           | 0.946            | 0.742           | 0.677, 1.320 | 1.571            | <b>0.043</b>     | 1.015, 2.433 |
| 48-59 months           | 1.023            | 0.906           | 0.697, 1.502 | 1.841            | <b>0.018</b>     | 1.112, 3.046 |
| <b>Sex of child</b>    |                  |                 |              |                  |                  |              |
| Females (ref)          | -                | -               | -            | -                | -                | -            |
| Males                  | 1.226            | <b>0.042</b>    | 1.007, 1.493 | 1.075            | 0.548            | 0.849, 1.361 |
| <b>Wealth Quintile</b> |                  |                 |              |                  |                  |              |
| Poorest (ref)          | -                | -               | -            | -                | -                | -            |
| Poorer                 | 0.587            | <b>&lt;.001</b> | 0.452, 0.762 | 0.880            | 0.338            | 0.677, 1.143 |
| Middle                 | 0.594            | <b>0.001</b>    | 0.437, 0.807 | 0.670            | <b>0.023</b>     | 0.475, 0.945 |
| Richer                 | 0.697            | 0.174           | 0.414, 1.173 | 0.768            | 0.343            | 0.445, 1.326 |

|                                         |       |              |              |       |              |              |
|-----------------------------------------|-------|--------------|--------------|-------|--------------|--------------|
| Richest                                 | 1.044 | 0.922        | 0.440, 2.478 | 0.601 | 0.164        | 0.919, 1.513 |
| <b>Perceived size of child at birth</b> |       |              |              |       |              |              |
| Very small or Small                     | 1.444 | <b>0.007</b> | 1.106, 1.884 | 1.468 | <b>0.008</b> | 1.108, 1.945 |
| Average or Larger (ref)                 | -     | -            | -            | -     | -            | -            |
| <b>Birth Intervals</b>                  |       |              |              |       |              |              |
| <24 months                              | 0.967 | 0.812        | 0.733, 1.276 | 0.803 | 0.207        | 0.570, 1.130 |
| 24-35 months                            | 1.043 | 0.767        | 0.790, 1.378 | 0.775 | 0.112        | 0.566, 1.062 |
| 36-47 months (ref)                      | -     | -            | -            | -     | -            | -            |
| 48+ months                              | 0.807 | 0.174        | 0.592, 1.100 | 0.668 | <b>0.008</b> | 0.496, 0.900 |
| <b>Avian influenza</b>                  |       |              |              |       |              |              |
| Household ownership of poultry/birds    | 0.933 | 0.507        | 0.761, 1.144 | 1.179 | 0.194        | 0.919, 1.513 |
| <b>Water and Sanitation</b>             |       |              |              |       |              |              |
| Piped water                             | 1.090 | 0.624        | 0.772, 1.540 | 0.997 | 0.987        | 0.661, 1.503 |
| Modern Flush Toilet                     | 0.395 | <b>0.011</b> | 0.193, 0.805 | 0.853 | 0.568        | 0.494, 1.474 |
